# Sevoflurane Ameliorates Gas Exchange and Attenuates Lung Damage in Experimental Lipopolysaccharide-induced Lung Injury

Stefanie Voigtsberger, M.D.,\* Robert A. Lachmann, M.D., Ph.D.,\* Anik C. Leutert, M.D.,\* Martin Schläpfer, M.D.,\* Christa Booy,† Livia Reyes,‡ Martin Urner, M.D.,\* Julia Schild, M.D.,\* Ralph C. Schimmer, M.D.,§ Beatrice Beck-Schimmer, M.D.||

**Background:** Acute lung injury is a common complication in critically ill patients. Several studies suggest that volatile anesthetics have immunomodulating effects. The aim of the current study was to assess possible postconditioning with sevoflurane in an *in vivo* model of endotoxin-induced lung injury.

**Methods:** Rats were anesthetized, tracheotomized, and mechanically ventilated. Lipopolysaccharide (saline as control) was administered intratracheally. Upon injury after 2 h of propofol anesthesia, general anesthesia was continued with either sevoflurane or propofol for 4 h. Arterial blood gases were measured every 2 h. After 6 h of injury, bronchoalveolar lavage was performed and lungs were collected. Total cell count, albumin content, concentrations of the cytokines cytokine-induced neutrophil chemoattractant-1 and monocyte chemoattractant protein-1, and phospholipids were analyzed in bronchoalveolar lavage fluid. Expression of messenger RNA for the two cytokines and for surfactant protein B was determined in lung tissue. Histopathologic examination of the lung was performed.

**Results:** Significant improvement of the ratio of oxygen tension to inspired oxygen fraction was shown with sevoflurane (mean  $\pm$  SD: 243  $\pm$  94 mmHg [32.4 kPa]) compared with propofol (88  $\pm$  19 mmHg [11.7 kPa]). Total cell count representing effector cell recruitment as well as albumin content as a measure of lung permeability were significantly decreased in the sevoflurane–lipopolysaccharide group compared with the propofol–lipopolysaccharide group in bronchoalveolar lavage fluid. Expression of the cytokines protein in bronchoalveolar lavage fluid as well as messenger RNA in lung tissue was significantly lower in the sevoflurane–lipopolysaccharide group compared with the propofol–lipopolysaccharide group.

**Conclusions:** Postconditioning with sevoflurane attenuates lung damage and preserves lung function in an *in vivo* model of acute lung injury.

ACUTE lung injury (ALI) and acute respiratory distress syndrome (ARDS) are common findings in today's intensive care units (ICUs).<sup>1</sup> Despite the introduction of new therapeutic approaches, mortality in patients with ARDS

could not be improved substantially since its first description<sup>2</sup> and remains high (30–40%).<sup>1,3</sup> To date, only low-tidal-volume ventilation has been shown to positively influence mortality in ARDS.<sup>4</sup>

Patients in ICUs who need mechanical ventilation because of ALI/ARDS are often sedated using intravenous sedatives such as propofol or midazolam.<sup>5</sup> Only recently it has become feasible to sedate patients with volatile anesthetics using the Anesthetic Conserving Device (AnaConDa; Sedana Medical AB, Sundbyberg, Sweden).

Apart from many direct advantages compared with intravenous drugs,<sup>6</sup> volatile anesthetics have been shown to possess antiinflammatory properties.<sup>7–9</sup> Furthermore, recent studies suggest that sevoflurane might act as a preconditioning and postconditioning agent<sup>10</sup> inducing organ protection in models of ALI due to inhibition of the expression of proinflammatory mediators. The knowledge about the immunomodulatory effects of volatile anesthetics mainly originates from ischemia-reperfusion injury studies. Administration of volatile anesthetics before ischemia, called *anesthetic preconditioning*, has been shown to attenuate ischemia-reperfusion-induced injury in the heart,<sup>11,12</sup> kidney,<sup>13</sup> lung,<sup>14,15</sup> and liver.<sup>9</sup> Although preconditioning seems to be an efficient approach, the possibility of postconditioning would be even more interesting and expand the clinical applicability, because it is not tied to a specific time point. In fact, the administration of volatile anesthetics after the onset of lung injury could be readily applied to many clinical scenarios in the operating room and even later in the ICU.

Based on our previous *in vitro* data, we hypothesized that postconditioning with sevoflurane might attenuate the inflammatory reaction in an *in vivo* model of endotoxin-induced lung injury.

## Materials and Methods

### Animal Preparation

After approval was obtained from the local animal care and use committee (Zurich, Switzerland), pathogen-free, male Wistar rats weighing 350–500 g (Charles River, Sulzfeld, Germany) were used. The rats were housed in standard cages at 22°  $\pm$  1°C under a 12/12-h light–dark regimen. Food and water were supplied *ad libitum*.

Rats were anesthetized with intraperitoneal sodium thiopental (100 mg/kg; Pentothal, Ospedalia AG, Hünen-

\* Research and Clinical Resident, ‡ Lab Technician, || Professor, Institute of Anesthesiology, Institute of Physiology and Center for Integrative Human Physiology, † Lab Technician, Institute of Physiology and Center for Integrative Human Physiology, § Senior Researcher, Department of Surgery, University of Zurich.

Received from the Institute of Anesthesiology, University of Zurich, Zurich, Switzerland. Submitted for publication February 9, 2009. Accepted for publication July 29, 2009. Supported by grant No. 3200B0-109558 from the Swiss National Science Foundation, Berne, Switzerland; Gebert Ruef Stiftung, Basel, Switzerland; Abbott AG, Baar, Switzerland; Lungenliga, Zurich, Switzerland; and Jubiläumstiftung der Schweizerischen Lebensversicherungs- und Rentenanstalt, Zurich, Switzerland. Drs. Voigtsberger and Lachmann contributed equally to this work.

Address correspondence to Dr. Beck-Schimmer: Institute of Anesthesiology, Institute of Physiology and Zurich Center for Integrative Human Physiology, University of Zurich Medical School, Winterthurerstrasse 190, CH-8057 Zurich, Switzerland. beatrice\_beck\_schimmer@access.uzh.ch. Information on purchasing reprints may be found at www.anesthesiology.org or on the masthead page at the beginning of this issue. ANESTHESIOLOGY's articles are made freely accessible to all readers, for personal use only, 6 months from the cover date of the issue.

berg, Switzerland). For continuous propofol infusion and fluid administration ( $10 \text{ ml} \cdot \text{kg}^{-1} \cdot \text{h}^{-1}$  sodium chloride), the tail vein was cannulated with a sterile 22-gauge catheter (BD Insyte; Becton Dickinson S.A., Madrid, Spain). A sterile polyethylene catheter for blood sampling and blood pressure monitoring was placed into the left carotid artery (pressure transducer; Spacelabs, Hertford, United Kingdom). The rats were tracheotomized, and a sterile metal cannula was inserted into the trachea, followed by mechanical ventilation in pressure-controlled mode (Servo Ventilator 300; Maquet, Solna, Sweden). Peak inspiratory pressure was  $14 \text{ cm H}_2\text{O}$ , with a positive end-expiratory pressure of  $3 \text{ cm H}_2\text{O}$ . The fractional inspired oxygen concentration ( $\text{F}_{\text{I}\text{O}_2}$ ) was 1.0, inspiratory:expiratory ratio was 1:2, and respiratory frequency was  $30 \text{ min}^{-1}$ . Arterial blood samples were analyzed at 0, 2, 4, and 6 h for arterial oxygen tension ( $\text{P}_{\text{a}\text{O}_2}$ ) and arterial carbon dioxide tension ( $\text{P}_{\text{a}\text{CO}_2}$ ). Body temperature was maintained at  $37^\circ\text{C}$  by a warming lamp.

To evaluate the oxygenation capability of the lung over time, the ratio of oxygen tension to inspired oxygen fraction ( $\text{P}_{\text{a}\text{O}_2}/\text{F}_{\text{I}\text{O}_2}$ ) was calculated at defined time points for each group (0, 2, 4, and 6 h), as well as alveoloarterial oxygen tension difference with values obtained from the Federal Office of Meteorology and Climatology MeteoSwiss (Zurich, Switzerland).

### Experimental Design

Rats were randomly assigned to four different groups: (1) propofol-lipopolysaccharide ( $n = 6$ ), (2) propofol-phosphate-buffered saline (PBS) ( $n = 4$ ), (3) sevoflurane-lipopolysaccharide ( $n = 6$ ), and (4) sevoflurane-PBS ( $n = 4$ ). Rats in the lipopolysaccharide groups were intratracheally instilled with  $150 \mu\text{g}$  *Escherichia coli*-lipopolysaccharide (serotype 055:B5; Sigma Aldrich, Buchs, Switzerland) in  $300 \mu\text{l}$  PBS.<sup>16</sup> Both control groups (propofol-PBS and sevoflurane-PBS) received  $300 \mu\text{l}$  intratracheally instilled PBS. After the application of either lipopolysaccharide or PBS, rats were ventilated as described and propofol was infused intravenously at a dose of  $10\text{--}20 \text{ mg} \cdot \text{kg}^{-1} \cdot \text{h}^{-1}$  to maintain anesthesia. Propofol, 97% (Sigma Aldrich, Buchs, Switzerland), was dissolved in a 14% Cremophor EL (Biochemika Fluka, Buchs, Switzerland) solution to a final concentration of  $10 \text{ mg/ml}$ .<sup>17</sup> Two hours after the onset of lung injury, the anesthetic was changed according to the protocol to either propofol or sevoflurane for a subsequent 4 h (6-h injury model with 4 h of postconditioning). Sevoflurane was administered using the AnaConDa system. The expiratory concentration of sevoflurane was measured with a multigas analyzer (VEO Multigas Monitor; PHASEIN Medical Technologies, Danderyd, Sweden). In all experiments, the concentration of sevoflurane was 1–2 vol% (0.5–1 minimum alveolar concentration, respectively).

### Preparation and Analysis of Samples

At the end of the experiment, animals were killed. The right heart was flushed with 10 ml PBS, after which a bronchoalveolar lavage was performed ( $3 \times 10 \text{ ml}$  PBS, pooled). The collected fluid was centrifuged at  $4^\circ\text{C}$  ( $1,500g$  for 10 min), and aliquots of the supernatant were frozen at  $-20^\circ\text{C}$ . The cell pellet was resuspended in 1 ml PBS. After the cells were dyed with trypan blue, they were counted with a Neubauer chamber.

Finally, lungs were shock-frozen in liquid nitrogen and stored at  $-80^\circ\text{C}$  for isolation of RNA.

### Measurement of Lung Permeability

To assess the differences in lung permeability between the study groups, total protein and albumin were measured in bronchoalveolar lavage fluid (BALF). Total protein was determined using a Bradford assay (Bio-Rad, Hercules, CA). Albumin levels were assessed using an enzyme-linked immunosorbent assay (ELISA; Bethyl Laboratories Inc., Montgomery, TX) according to the manufacturer's protocol. The detection range for albumin was 7.8–10,000 ng/ml.

### ELISA

Sandwich ELISAs were performed according to the manufacturer's protocol assessing the chemokines cytokine-induced neutrophil chemoattractant-1 (CINC-1; R&D Systems Europe Ltd., Abingdon, United Kingdom) and monocyte chemoattractant protein-1 (MCP-1; BD Biosciences, San Diego, CA). The detection range was 7.8–1,000 pg/ml for CINC-1 protein and 62.5–16,000 pg/ml for MCP-1.

### RNA Extraction and Real-time PCR for CINC-1 and MCP-1

Total RNA was isolated from lung tissue using the RNeasy Mini Kit (Qiagen, Basel, Switzerland) according to the manufacturer's protocol. Tissue was lysed in the provided buffer and subsequently loaded on RNeasy mini spin columns. RNA was eluted with RNase-free water. Total amounts and purity of RNA were determined by absorbance at 260 nm and the 260/280-nm absorbance ratio, respectively.

Reverse transcription was performed with  $0.8 \mu\text{g}$  total RNA at  $20^\circ\text{C}$  for 5 min,  $42^\circ\text{C}$  for 30 min, and  $95^\circ\text{C}$  for 5 min. Random hexanucleotide primers and murine leukemia virus reverse transcriptase were used for complementary DNA synthesis.

Real-time quantitative TaqMan polymerase chain reaction (PCR) was performed on a GeneAmp 5700 system (P.E. Applied Biosystems, Waltham, MA). Specific primers (Microsynth, Balgach, Switzerland) and labeled TaqMan probes (Roche Applied Science, Basel, Switzerland) were designed for MCP-1, CINC-1, and 18S. The TaqMan universal PCR Master Mix (Applied Biosystems, Branchburg, NJ) was used for the assays in a final reaction

**Table 1. Primers and Probes Used for the Real-time Quantitative TaqMan PCR\***

| Gene      | Primer Sequence                      | Length of Amplicon, nt |
|-----------|--------------------------------------|------------------------|
| CINC-1    |                                      |                        |
| Up        | 5' CAC ACT CCA ACA GAG CAC CA 3'     | 120                    |
| Down      | 5' TGA CAG CGC AGC TCA TTG 3'        |                        |
| Probe 49  | 5' CAG CCA CC 3'                     |                        |
| MCP-1     |                                      |                        |
| Up        | 5' AGC ATC CAC GTG CTG TCT C 3'      | 78                     |
| Down      | 5' GAT CAT CTT GCC AGT GAA TGA GT 3' |                        |
| Probe 62  | 5' ACC TGC TG 3'                     |                        |
| SP-B      |                                      |                        |
| Up        | 5' TCT GCA ATG CTT CCA AAC C 3'      | 65                     |
| Down      | 5' GGT CCT TTG GTA CAG GTT GC 3'     |                        |
| Probe 116 | 5' CCA GGC TC 3'                     |                        |
| 18S       |                                      |                        |
| Up        | 5' GGA GCC TGA GAA ACG GCT A 3'      | 64                     |
| Down      | 5' TCG GGA GTG GGT AAT TTG C 3'      |                        |
| Probe 74  | 5' GGC AGC AG 3'                     |                        |

\* P.E. Applied Biosystems, Waltham, MA.

18S = housekeeping gene; CINC-1 = cytokine-induced neutrophil chemoattractant-1; MCP-1 = monocyte chemoattractant protein-1; nt = nucleotides; PCR = polymerase chain reaction; SP-B = surfactant protein B.

volume of 15  $\mu$ l. All primers and probes used in the experiments are presented in table 1. Each experimental PCR run was performed in duplicate with simultaneous assays for controls with no template.

For quantitation of gene expression, the comparative  $C_t$  method was used as described by Livak *et al.*<sup>18</sup> The  $C_t$  values of samples (propofol-lipopolysaccharide and sevoflurane-lipopolysaccharide) and controls (propofol-PBS and sevoflurane-PBS) were normalized to the housekeeping gene (18S) and calculated as  $2^{-\Delta\Delta C_t}$ , where  $\Delta\Delta C_t = \Delta C_{t,samples} - \Delta C_{t,controls}$ .

### Histopathologic Analysis

For histologic examination, lungs (previously not flushed in the respiratory compartment) were fixed with 3% paraformaldehyde in PBS and then imbedded in TissueTek (Sakura Finetec Inc., Torrance, CA). A series of microsections (7  $\mu$ m) of every study group was stained with hematoxylin and eosin. Lung injury was quantified by three blinded researchers, using a lung injury score described previously.<sup>19,20</sup> The lung pathology was assessed by various degrees of edema (0 = no, 1 = mild, 2 = moderate, 3 = severe) and reactive cell infiltration (0 = no, 1 = mild, 2 = moderate, 3 = severe). Adding these two individual scores resulted in the final score ranging from 0 to 6.

### Isolation of Surfactant and Phospholipid Assay

Surfactant was pelleted by high-speed centrifugation (30,000g for 45 min at 4°C). The crude pellet was resuspended in 110  $\mu$ l saline, 0.9%, and total phospholipid content was measured using the method of Stewart.<sup>21</sup> Fifty microliters of sample was added to glass tubes containing 2 ml spectroscopic-grade chloroform. Two milliliters ammonium ferrocyanate, 3.04% (wt/vol), and

ferric chloride hexahydrate, 2.7% (wt/vol), in distilled H<sub>2</sub>O was added, and the mixture was vortexed for 1 min. Standards (0–100 mg/ml) were prepared with phosphatidylcholine in chloroform. The lower chloroform phase was withdrawn, and absorption was measured at 488 nm with a quartz cuvette.

### In Vitro Experiments with RPAECs and AECs

#### Rat Pulmonary Artery Endothelial Cell Culture.

The cell line, kindly provided by Roscoe Warner, Ph.D. (Research Assistant Professor, Department of Pathology, University of Michigan, Ann Arbor, Michigan), was cultured in Dulbecco modified Eagle medium (DMEM; Invitrogen AG, Basel, Switzerland), supplemented with 10% fetal bovine serum (FBS), 1% penicillin-streptomycin, and 1% HEPES buffer in an incubator with 5% CO<sub>2</sub>. They were grown in uncoated 35  $\times$  10-mm plates (Corning Inc., Corning, NY) to more than 95% confluence. DMEM-10% FBS was replaced by DMEM-1% FBS 24 h before lipopolysaccharide stimulation. Rat pulmonary artery endothelial cells (RPAECs) were stimulated with lipopolysaccharide from *Escherichia coli*, serotype 055:B5 (Sigma, Buchs, Switzerland), in a concentration of 20  $\mu$ g/l in DMEM-1% FBS for 6 h (control group only stimulation with PBS in DMEM-1% FBS instead of lipopolysaccharide).

**Alveolar Epithelial Cell Culture.** The L2 cell line (CCL 149; American Type Culture Collection, Rockville, MD) was derived through cloning of adult female rat lung of alveolar epithelial cell (AEC) type II origin.<sup>22</sup> The cells were cultured and stimulated in the same way as RPAECs.

**Hypercapnia.** For the incubation time of 6 h, the following carbon dioxide concentrations were chosen: 5% (control), 7.5%, and 10%. After the incubation supernatants were collected, ELISAs were performed and expression of CINC-1 and MCP-1 was analyzed.

**Incubation with Propofol.** Control and stimulated RPAECs and AECs were exposed to propofol diluted in 14% Cremophor EL for 6 h. After the incubation, supernatants were collected, ELISAs were performed, and expression of CINC-1 and MCP-1 was analyzed.

For all experiments, cell viability was 95% as determined by measurement of lactate dehydrogenase (Cytotox 96, Non-Radioactive Cytotoxicity Assay; Promega, Madison, WI).

### Statistical Analysis

Values were expressed as mean  $\pm$  SD.

The ratio of oxygen tension to inspired oxygen fraction and alveoloarterial oxygen tension difference (P<sub>O<sub>2</sub></sub> difference) data were tested by analysis of variances for repeated measurements (two-way analysis of variance). The interaction testing between group and time from the repeated measures has been performed. ELISA data were tested by analysis of variance for repeated measurements (one-way analysis of variance) with a Tukey-Kramer multiple *post hoc* test. Real-time PCR data were tested using a *t* test with



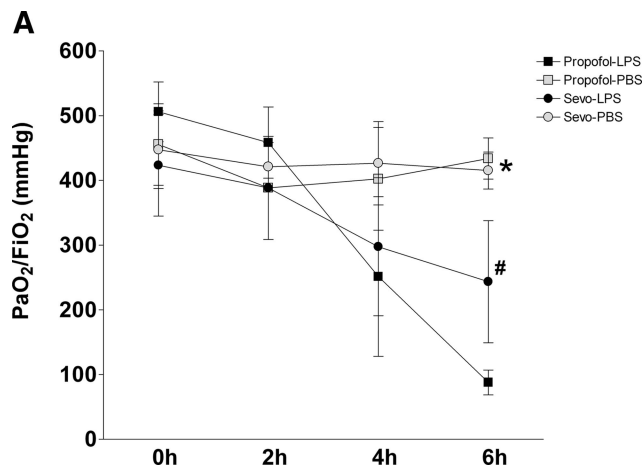

**Fig. 1.** Determination of ratio of oxygen tension to inspired oxygen fraction ( $P_{aO_2}/F_{iO_2}$ ).  $P_{aO_2}/F_{iO_2}$  was determined in the four study groups after 0, 2, 4, and 6 h: propofol-lipopolysaccharide (LPS) (closed squares), propofol-phosphate-buffered saline (PBS) (open squares), sevoflurane (Sevo)-LPS (closed circles), and Sevo-PBS (open circles). #  $P < 0.05$  Sevo-LPS versus propofol-LPS. \*  $P < 0.05$ , both PBS groups versus both LPS groups. Propofol-LPS, propofol-PBS: Instillation of LPS or PBS intratracheally, followed by ventilation and sedation with propofol for 6 h. Sevo-LPS, Sevo-PBS: Instillation of LPS or PBS intratracheally, followed by ventilation and sedation with propofol for 2 h and with sevoflurane for the following 4 h. Values are mean  $\pm$  SD from  $n = 6$  (LPS) and  $n = 4$  (PBS) experiments.

two-tailed hypothesis testing. GraphPad Prism4 and GraphPad InStat3 (GraphPad Software, La Jolla, CA) were used for statistical analyses.  $P$  values of 0.05 or less were considered statistically significant.

**Results**

*Gas Exchange*

Intratracheal lipopolysaccharide resulted in a significant decrease of  $P_{aO_2}/F_{iO_2}$  for both anesthetics (propofol and sevoflurane) compared with the PBS controls after

6 h of injury (fig. 1). Animals in the sevoflurane-lipopolysaccharide group had a significantly higher  $P_{aO_2}/F_{iO_2}$  ( $243 \pm 94$  mmHg [ $32.4$  kPa]) compared with the propofol-lipopolysaccharide group ( $88 \pm 19$  mmHg [ $11.7$  kPa]) after 6 h of lipopolysaccharide injury. There were no significant differences between the two PBS groups (sevoflurane-PBS,  $415 \pm 28$  mmHg [ $55.3$  kPa]; propofol-PBS,  $433 \pm 32$  mmHg [ $57.7$  kPa]; fig. 1). The influence of factor sevoflurane and time was  $P = 0.0169$  and  $P = 0.0202$ , respectively. No significant interaction could be found between sevoflurane and time ( $P = 0.3284$ ).

Accordingly, intratracheal lipopolysaccharide resulted in an increase of the alveoloarterial oxygen tension difference ( $P_{O_2}$  difference) for both anesthetics. The propofol-lipopolysaccharide group had a significantly higher  $P_{O_2}$  difference compared with the sevoflurane-lipopolysaccharide group after 6 h, whereas no differences were found in the PBS groups (data not shown).

Arterial carbon dioxide tension levels were higher in both lipopolysaccharide groups compared with the PBS groups.  $P_{aCO_2}$  was significantly higher in the propofol-lipopolysaccharide group ( $56.6 \pm 8.1$  mmHg [ $7.5$  kPa]) compared with the sevoflurane-lipopolysaccharide group ( $42.2 \pm 7.1$  mmHg [ $5.6$  kPa]) after 6 h of lipopolysaccharide injury (table 2).

*Circulatory Variables*

Mean arterial pressure decreased in all four study groups during the course of the experiment. There were no significant differences in mean arterial pressure between the four groups at any time (table 2).

*BALF Analysis*

The recovery of BALF was comparable in all study groups. Seventy percent of administered fluid was retrieved.

**Table 2.**  $P_{aCO_2}$ , MAP, Protein in BAL, and Lung Injury Score

|                               | Propofol-LPS     | Propofol-PBS    | Sevoflurane-LPS   | Sevoflurane-PBS |
|-------------------------------|------------------|-----------------|-------------------|-----------------|
| <b>Paco<sub>2</sub>, mmHg</b> |                  |                 |                   |                 |
| 0 h                           | 33.9 $\pm$ 7.9   | 28.1 $\pm$ 2.2  | 38 $\pm$ 15.5     | 30.4 $\pm$ 5.1  |
| 2 h                           | 40.8 $\pm$ 8.4   | 39.1 $\pm$ 16.3 | 34.5 $\pm$ 10.9   | 30 $\pm$ 6.5    |
| 4 h                           | 44.9 $\pm$ 9     | 35.9 $\pm$ 1.2  | 37.3 $\pm$ 16.4   | 44.6 $\pm$ 21.8 |
| 6 h                           | 56.6 $\pm$ 8.1   | 27.5 $\pm$ 9.5  | 42.2 $\pm$ 7.1*   | 42.4 $\pm$ 15.9 |
| <b>MAP, mmHg</b>              |                  |                 |                   |                 |
| 0 h                           | 126 $\pm$ 16     | 140 $\pm$ 26    | 140 $\pm$ 18      | 150 $\pm$ 8     |
| 2 h                           | 112 $\pm$ 15     | 120 $\pm$ 29    | 117 $\pm$ 15      | 114 $\pm$ 15    |
| 4 h                           | 108 $\pm$ 27     | 103 $\pm$ 24    | 113 $\pm$ 27      | 106 $\pm$ 28    |
| 6 h                           | 83 $\pm$ 27      | 95 $\pm$ 24     | 105 $\pm$ 24      | 114 $\pm$ 23    |
| Protein BAL, mg/ml            | 2.26 $\pm$ 0.32  | 0.76 $\pm$ 0.07 | 1.39 $\pm$ 0.51†* | 0.91 $\pm$ 0.23 |
| Lung injury score             | 3.17 $\pm$ 1.33‡ | 0.83 $\pm$ 0.75 | 2.17 $\pm$ 1.72†  | 1.5 $\pm$ 0.75  |

Data are mean  $\pm$  SD. Partial arterial carbon dioxide tension ( $P_{aCO_2}$ ) levels were determined in the four study groups after 0, 2, 4, and 6 hours. Mean arterial pressure (MAP) was determined in the four study groups after 0, 2, 4, and 6 h. Values were not statistically significant at any time.

\*  $P < 0.05$  vs. propofol-lipopolysaccharide (LPS). Protein concentration in bronchoalveolar lavage (BAL) fluid: †  $P < 0.01$  vs. propofol-LPS; ‡  $P < 0.001$  vs. propofol-phosphate-buffered saline (PBS). Lung injury score: †  $P < 0.001$  vs. sevoflurane-PBS and propofol-PBS; ‡  $P < 0.001$  vs. sevoflurane-PBS and propofol-PBS.

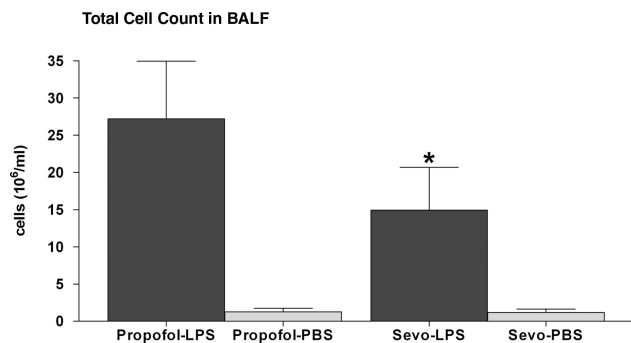

**Fig. 2.** Evaluation of total cell count in bronchoalveolar lavage fluid. Bronchoalveolar lavage fluid was collected after 6 h in the four study groups (propofol-lipopolysaccharide [LPS], propofol-phosphate-buffered saline [PBS], sevoflurane [Sevo]-LPS, and Sevo-PBS). Trypan staining was performed with the solid part of bronchoalveolar lavage. \*  $P < 0.05$  versus propofol-LPS. Propofol-LPS, propofol-PBS: Instillation of LPS or PBS intratracheally, followed by ventilation and sedation with propofol for 6 h. Sevo-LPS, Sevo-PBS: Instillation of LPS or PBS intratracheally, followed by ventilation and sedation with propofol for 2 h and with sevoflurane for the following 4 h. Values are mean  $\pm$  SD from  $n = 6$  (LPS) and  $n = 4$  (PBS) experiments.

#### Total Cell Count

Total cell count in BALF was determined as a measure of effector cell recruitment. Cells in BALF of PBS animals were identified as alveolar macrophages, whereas 99.5% of the cells in lipopolysaccharide animals were neutrophils. Cell count increased significantly in both lipopolysaccharide groups compared with both control groups. The sevoflurane-lipopolysaccharide group showed a significantly lower total cell number compared with the propofol-lipopolysaccharide group (sevoflurane-lipopolysaccharide,  $14.94 \pm 5.72$  cells/ $10^6$ /ml; propofol-lipopolysaccharide,  $27.18 \pm 7.75$  cells/ $10^6$ /ml; fig. 2). There were no significant differences between the PBS groups.

#### Albumin and Proteins

Albumin concentration in BALF, reflecting alveolocapillary permeability, was significantly lower in the sevoflurane-LPS group compared with the propofol-lipopolysaccharide group (sevoflurane-lipopolysaccharide,  $4.9 \pm 3.8$   $\mu$ g/ml; propofol-lipopolysaccharide,  $10.4 \pm 3.5$   $\mu$ g/ml; fig. 3). The alveolar protein content as a measure of accumulation of proteins upon inflammation was significantly higher in the lipopolysaccharide groups compared with the PBS groups. In addition, a significantly lower protein concentration was found in the sevoflurane-lipopolysaccharide group compared with the propofol-lipopolysaccharide group (sevoflurane-lipopolysaccharide,  $1.39 \pm 0.51$  mg/ml; propofol-lipopolysaccharide,  $2.26 \pm 0.32$  mg/ml; table 2).

#### Chemokine Analysis

The protein concentration of the chemokines CINC-1 and MCP-1 in BALF was assessed by ELISA. CINC-1 and MCP-1 level increased significantly in both lipopolysaccharide groups compared with both PBS groups. The

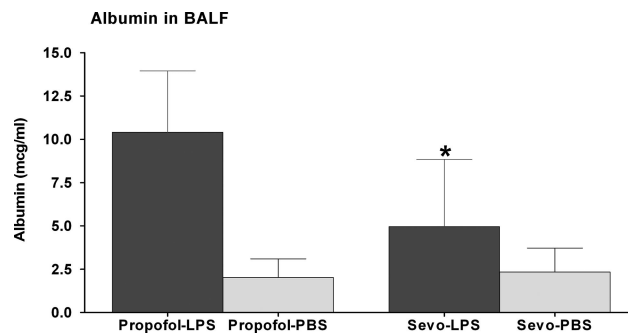

**Fig. 3.** Measurement of lung hyperpermeability. Bronchoalveolar lavage fluid was collected after 6 h in the four study groups (propofol-lipopolysaccharide [LPS], propofol-phosphate-buffered saline [PBS], sevoflurane [Sevo]-LPS, and Sevo-PBS). Albumin enzyme-linked immunosorbent assay was performed with supernatants. \*  $P < 0.05$  versus propofol-LPS. Propofol-LPS, propofol-PBS: Instillation of LPS or PBS intratracheally, followed by ventilation and sedation with propofol for 6 h. Sevo-LPS, Sevo-PBS: Instillation of LPS or PBS intratracheally, followed by ventilation and sedation with propofol for 2 h and with sevoflurane for the following 4 h. Values are mean  $\pm$  SD from  $n = 6$  (LPS) and  $n = 4$  (PBS) experiments.

sevoflurane-lipopolysaccharide group showed significantly lower levels of CINC-1 and MCP-1 compared with the propofol-lipopolysaccharide group (figs. 4A and B). In the sevoflurane-lipopolysaccharide group, CINC-1 and MCP-1 expression decreased 29% and 53%, respectively, compared with the propofol-lipopolysaccharide group.

#### Lung Tissue Analysis

The expression of messenger RNA (mRNA) of CINC-1 and MCP-1 was analyzed in total lung tissue by real-time PCR. Values were normalized to 18S and expressed relatively to controls (PBS groups). The mRNA expression in both lipopolysaccharide groups was significantly increased compared with both PBS groups. Again, the sevoflurane-lipopolysaccharide group showed significantly lower mRNA levels compared with the propofol-lipopolysaccharide group (figs. 5A and B): in the sevoflurane-lipopolysaccharide group, CINC-1 mRNA and MCP-1 mRNA expression decreased by 42% and 53%, respectively, compared with the propofol-lipopolysaccharide group.

#### Histopathologic Analysis

As expected, intratracheal lipopolysaccharide resulted in a pulmonary edema with inflammatory cell recruitment (fig. 6). Quantification of the injury showed a significant increase of the lung injury score in both lipopolysaccharide groups compared with the PBS groups. However, there was no significant difference between the sevoflurane-lipopolysaccharide group and the propofol-lipopolysaccharide group (table 2).

#### AEC Injury

Evaluation of surfactant protein B (SP-B) RNA expression in lung tissue revealed a decrease in the expression of SP-B

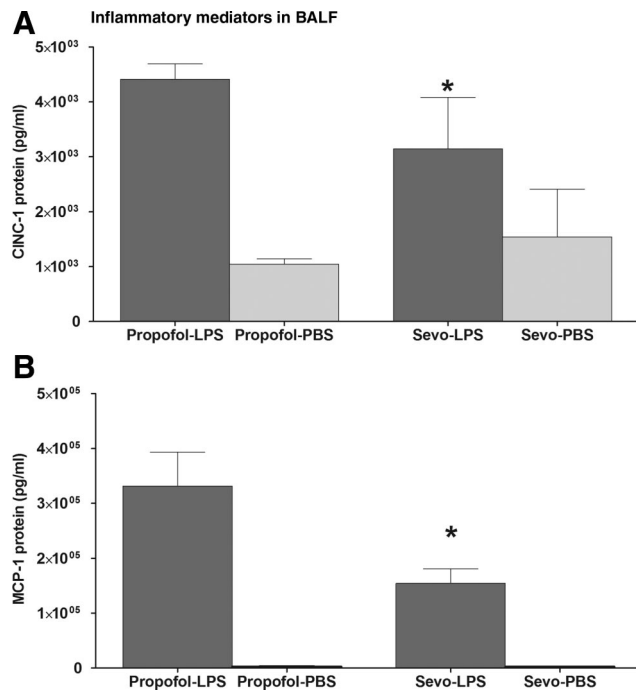

**Fig. 4.** Evaluation of cytokine-induced neutrophil chemoattractant-1 (CINC-1; *A*) and monocyte chemoattractant protein-1 (MCP-1; *B*) protein expression in bronchoalveolar lavage fluid. Bronchoalveolar lavage fluid was collected after 6 h in the four study groups (propofol-lipopolysaccharide [LPS], propofol-phosphate-buffered saline [PBS], sevoflurane [Sevo]-LPS, and Sevo-PBS). CINC-1 and MCP-1 enzyme-linked immunosorbent assays were performed with supernatants. \*  $P < 0.05$  versus propofol-LPS. Propofol-LPS, propofol-PBS: Instillation of LPS or PBS intratracheally, followed by ventilation and sedation with propofol for 6 h. Sevo-LPS, Sevo-PBS: Instillation of LPS or PBS intratracheally, followed by ventilation and sedation with propofol for 2 h and with sevoflurane for the following 4 h. Values are mean  $\pm$  SD from  $n = 6$  (LPS) and  $n = 4$  (PBS) experiments.

in both lipopolysaccharide groups compared with controls. However, decrease of SP-B in the sevoflurane-lipopolysaccharide animals was less accentuated compared with propofol-lipopolysaccharide animals (fig. 7).

Furthermore, analysis of the phospholipid content in bronchoalveolar lavage revealed an increase in the expression of phospholipids in both lipopolysaccharide groups compared with controls. The propofol-lipopolysaccharide animals showed significantly higher phospholipid levels compared with the sevoflurane-lipopolysaccharide animals (fig. 8).

#### In Vitro Experiments with RPAECs and AECs

Because a significantly higher  $P_{CO_2}$  was observed in the lipopolysaccharide-propofol group after 6 h of injury, we analyzed the possible proinflammatory effect of hypercapnia on RPAECs and AECs with or without lipopolysaccharide stimulation. Carbon dioxide values of 7.5% or 10% did not seem to have an impact on the inflammatory reaction in RPAECs or AECs compared with 5%  $CO_2$  (figs. 9A and B). Similarly, we analyzed the possible proinflammatory effects of propofol in 14% Cremophor. Because AECs are not in

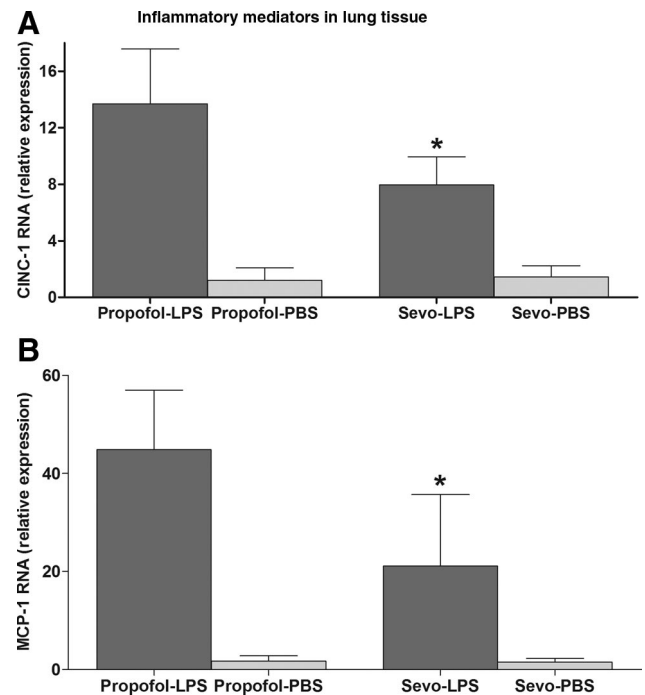

**Fig. 5.** Evaluation of cytokine-induced neutrophil chemoattractant-1 (CINC-1; *A*) and monocyte chemoattractant protein-1 (MCP-1; *B*) messenger RNA expression in lung tissue. Lung tissue was collected after 6 h in the four study groups (propofol-lipopolysaccharide [LPS], propofol-phosphate-buffered saline [PBS], sevoflurane [Sevo]-LPS, and Sevo-PBS). CINC-1- and MCP-1-specific real-time polymerase chain reactions were performed on random transcribed complementary DNA. \*  $P < 0.05$  versus propofol-LPS. Propofol-LPS, propofol-PBS: Instillation of LPS or PBS intratracheally, followed by ventilation and sedation with propofol for 6 h. Sevo-LPS, Sevo-PBS: Instillation of LPS or PBS intratracheally, followed by ventilation and sedation with propofol for 2 h and with Sevoflurane for the following 4 h. Values are mean  $\pm$  SD from  $n = 6$  (LPS) and  $n = 4$  (PBS) experiments.

direct contact with the anesthetic, we used smaller concentrations of propofol for the *in vitro* approach. No proinflammatory effects were shown in nonstimulated RPAECs or AECs. Stimulation with lipopolysaccharide in the presence of propofol resulted in the same increase of CINC-1 and MCP-1 levels as observed in the lipopolysaccharide group (figs. 9C and D).

## Discussion

The current study demonstrates that anesthetic postconditioning with sevoflurane improves oxygenation and attenuates lung damage as indicated by less recruitment of effector cells into the respiratory compartment, decreases expression of the proinflammatory mediators CINC-1 and MCP-1, and reduces lung hyperpermeability in an *in vivo* model of lipopolysaccharide-induced lung injury.

These results corroborate our previous *in vitro* studies, where we showed a significant reduction of proinflammatory mediators by preconditioning<sup>7</sup> and by postconditioning<sup>10</sup> of AECs with sevoflurane in *in vitro*



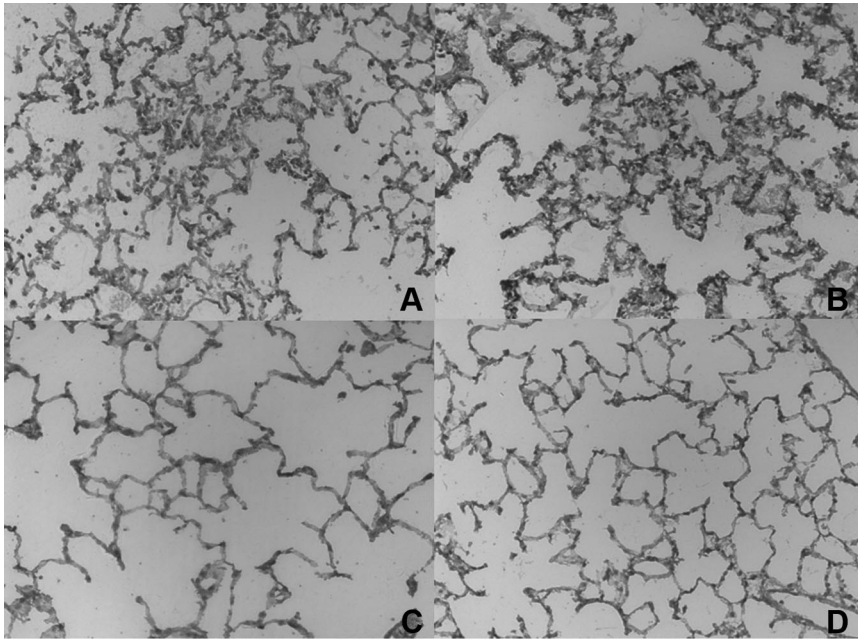

Fig. 6. Micrographs of representative lung section. (A) Propofol-lipopolysaccharide (LPS), (B) sevoflurane (Sevo)-LPS, (C) propofol-phosphate-buffered saline (PBS), and (D) Sevo-PBS. Hematoxylin and eosin staining, original magnification  $\times 20$ . Propofol-LPS, propofol-PBS: Instillation of LPS or PBS intratracheally, followed by ventilation and sedation with propofol for 6 h. Sevo-LPS, Sevo-PBS: Instillation of LPS or PBS intratracheally, followed by ventilation and sedation with propofol for 2 h and with sevoflurane for the following 4 h.

models of lipopolysaccharide-induced injury. This is the first *in vivo* study comparing the postconditioning effects of sevoflurane and propofol in a model of ALI.

First, we focused on the effect of both anesthetics on oxygenation capability of the lung. The significant improvement of  $\text{PaO}_2/\text{FiO}_2$  by postconditioning with sevoflurane after 6 h is most likely due to a less impaired gas exchange compared with propofol sedation. This was also reflected in the calculations of alveolar-arterial oxygen tension difference. As discussed below, the reason for this seems to be an attenuation of lung damage after lipopolysaccharide challenge. To our knowledge, the amelioration of  $\text{PaO}_2$  by postconditioning with a

volatile anesthetic in an *in vivo* model of ALI has not yet been described in the literature.

A possible explanation for the deteriorated  $\text{PaO}_2/\text{FiO}_2$  ratio could be an inhibition of the hypoxic pulmonary vasoconstriction (HPV) by both anesthetics. Clinical investigations are not conclusive regarding the possible effect of anesthetics on HPV. In animal models, volatile anesthetics seem to inhibit HPV, and increase intrapulmonary shunt fraction or reduce arterial oxygen tension in a dose-response manner,<sup>15,23,24</sup> whereas propofol does not affect HPV.<sup>25</sup> In the clinical scenario, however, in patients undergoing one-lung ventilation, sevoflurane and propofol have been shown to have similar effects on shunt fraction and arterial oxygen tension.<sup>26,27</sup> In our

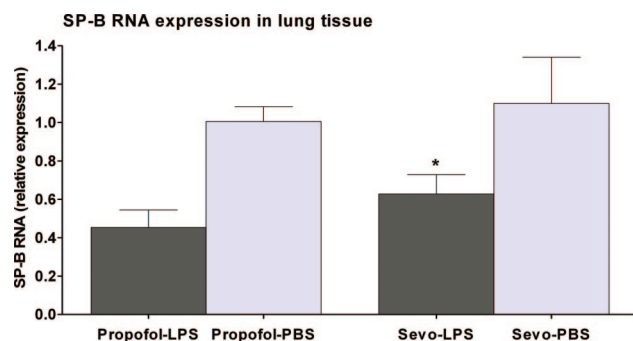

Fig. 7. Evaluation of surfactant protein B (SP-B) messenger RNA expression in lung tissue. Lung tissue was collected after 6 h in the four study groups (propofol-lipopolysaccharide [LPS], propofol-phosphate-buffered saline [PBS], sevoflurane [Sevo]-LPS, and Sevo-PBS). SP-B-specific real-time polymerase chain reaction was performed on random transcribed complementary DNA. \*  $P < 0.05$  versus propofol-LPS. Propofol-LPS, propofol-PBS: Instillation of LPS or PBS intratracheally, followed by ventilation and sedation with propofol for 6 h. Sevo-LPS, Sevo-PBS: Instillation of LPS or PBS intratracheally, followed by ventilation and sedation with propofol for 2 h and with sevoflurane for the following 4 h. Values are mean  $\pm$  SD from  $n = 6$  (LPS) and  $n = 4$  (PBS) experiments.

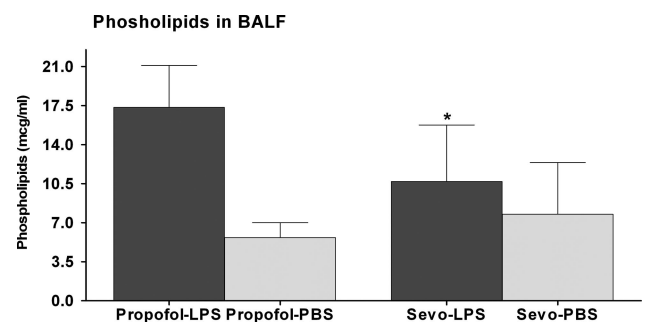

Fig. 8. Evaluation of phospholipids in bronchoalveolar lavage fluid. Bronchoalveolar lavage fluid was collected after 6 h in the four study groups (propofol-lipopolysaccharide [LPS], propofol-phosphate-buffered saline [PBS], sevoflurane [Sevo]-LPS, and Sevo-PBS). Phospholipid assay was performed with supernatants. \*  $P < 0.05$  versus propofol-LPS. Propofol-LPS, propofol-PBS: Instillation of LPS or PBS intratracheally, followed by ventilation and sedation with propofol for 6 h. Sevo-LPS, Sevo-PBS: Instillation of LPS or PBS intratracheally, followed by ventilation and sedation with propofol for 2 h and with sevoflurane for the following 4 h. Values are mean  $\pm$  SD from  $n = 6$  (LPS) and  $n = 4$  (PBS) experiments.

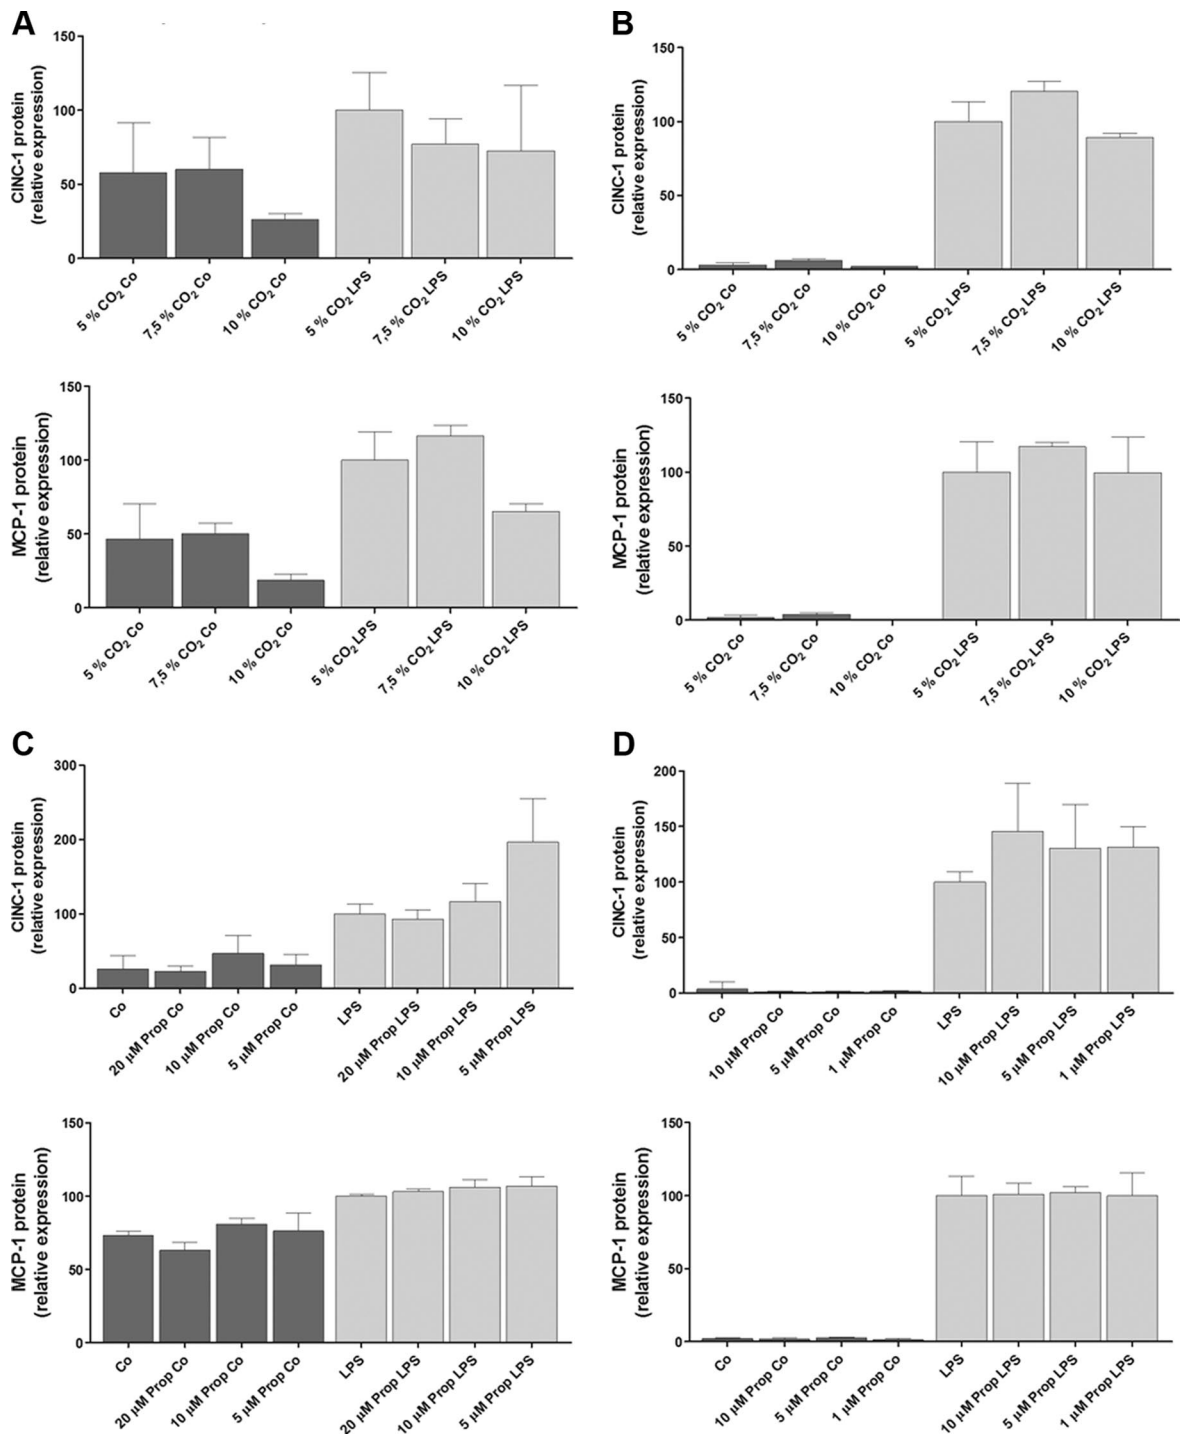

**Fig. 9.** (A) Evaluation of cytokine-induced neutrophil chemoattractant-1 (CINC-1) and monocyte chemoattractant protein-1 (MCP-1) expression in rat pulmonary artery endothelial cells (RPAECs) in hypercapnia. RPAECs were incubated with carbon dioxide (CO<sub>2</sub>) at concentrations of 5, 7.5, and 10% for 6 h after stimulation with lipopolysaccharide (LPS). Co = control without LPS stimulation. Supernatants were collected. Enzyme-linked immunosorbent assays of CINC-1 and MCP-1 were performed. (B) Evaluation of CINC-1 and MCP-1 expression in alveolar epithelial cells (AECs) in hypercapnia. AECs were incubated with CO<sub>2</sub> at concentrations of 5, 7.5, and 10% for 6 h after stimulation with LPS. Supernatants were collected. Enzyme-linked immunosorbent assays of CINC-1 and MCP-1 were performed. (C) Evaluation of CINC-1 and MCP-1 expression in RPAECs after incubation with propofol. RPAECs were incubated with propofol at concentrations of 20, 10, and 5 μM for 6 h after stimulation with LPS. Supernatants were collected. Enzyme-linked immunosorbent assays of CINC-1 and MCP-1 were performed. (D) Evaluation of CINC-1 and MCP-1 expression in AECs after incubation with propofol. AECs were incubated with propofol at concentrations of 10, 5, and 1 μM for 6 h after stimulation with LPS. Supernatants were collected. Enzyme-linked immunosorbent assays of CINC-1 and MCP-1 were performed. Values are mean ± SD from 3 experiments.



model, the impact of the volatile anesthetic-induced inhibition of HPV cannot be excluded.

Second, the expression of CINC-1 and MCP-1 was studied. These chemoattractants have been shown to possess potent chemotactic activity for neutrophils (CINC-1 and MCP-1) and monocytes (MCP-1) and therefore play a significant role in the acute inflammatory response in ALI.<sup>28-31</sup> The decrease of CINC-1 and MCP-1 proteins in bronchoalveolar lavage and of the mRNA in lung tissue by postconditioning with sevoflurane on the molecular level suggests a functional attenuation of inflammation by reduction of effector cell recruitment. In fact, we were able to prove this reduction of effector cells in the BALF (total cell count).

Third, alveolar albumin and protein influx as markers of increased influx of inflammatory proteins and alveolocapillary leakage, respectively, were evaluated. Lung hyperpermeability causing pulmonary edema is thought to be a main mechanism inducing ARDS.<sup>5,32</sup> Again, postconditioning with sevoflurane significantly decreased albumin and protein influx. Recently, it was shown that reduction of lung hyperpermeability protects against lipopolysaccharide-induced lung injury.<sup>33</sup> Therefore, the therapeutic effects of sevoflurane on ALI could be mediated by reduction of lung hyperpermeability.

Fourth, SP-B RNA expression in lung tissue was significantly less decreased upon lipopolysaccharide injury in the sevoflurane group compared with the propofol group, indicating a milder degree of injury. SP-B plays a critical role for maintenance of stability of surfactant. As shown in previous experimental approaches, expression of SP-B is decreased upon injury, probably as a consequence of destruction of the alveolocapillary unit with alveolar epithelial type II cells.<sup>34,35</sup>

Fifth, lipopolysaccharide-propofol animals showed a significantly higher expression of phospholipids in BALF. We hypothesize that increases in phospholipids in the alveolar space could be due to decreases in surfactant clearance by type II cells and the cells resident in the alveolar space. Summarized, both results regarding SP-B and phospholipids underline a less deteriorated surfactant function by postconditioning with sevoflurane compared with propofol after lipopolysaccharide challenge.<sup>36</sup>

Up to now, several *in vivo* studies have explored the effects of sevoflurane on lung tissue but with inconsistent results. Takala *et al.*<sup>37</sup> compared sevoflurane anesthesia with thiopentone anesthesia in a model of ventilated healthy pigs. It was demonstrated that AEC type II cell integrity and ultrastructure remained unchanged after long-term (6-h) high-concentration exposure to sevoflurane (1.5 minimum alveolar concentration). Furthermore, a lower gene expression of tumor necrosis factor- $\alpha$  and interleukin-1 $\beta$  was detectable in the intact porcine lung tissue after sevoflurane anesthesia.<sup>38</sup> On the other hand, an increase of pulmonary inflammatory

mediators and pulmonary NO<sub>3</sub> and NO<sub>2</sub> production after sevoflurane anesthesia was revealed by another study using the same model.<sup>39</sup> However, this study was not based on an ALI model. In addition, the sevoflurane concentration of 4 vol% was rather high compared with our model.

To exclude a proinflammatory effect of propofol dissolved in Cremophor on pulmonary cells, we performed *in vitro* experiments. RPAECs were coexposed to propofol in concentrations previously reported.<sup>40,41</sup> No increased cytotoxicity or enhanced inflammatory response could be observed. In addition, it should be mentioned that several studies have pointed out a protective effect of propofol as well.<sup>42-44</sup>

Another component, which theoretically could enhance inflammatory injury, is the increased content of carbon dioxide after 6 h of injury. We discussed this increase as a consequence of injury. *In vitro* experiments underlined our hypothesis by showing that increased concentrations of carbon dioxide did not interfere with the inflammatory reaction. This is in accord with the literature, where only carbon dioxide values of 15% or 20% induced an additional injury.<sup>45</sup>

Few reports exist focusing on the postconditioning capabilities of sevoflurane in acute lung injury. In a recent publication, Hofstetter *et al.*<sup>46</sup> examined the antiinflammatory effects of sevoflurane in an *in vivo* model of lipopolysaccharide-induced endotoxemia in rats. In this study, administration of sevoflurane 15 min after stimulation with lipopolysaccharide resulted in a decrease of tumor necrosis factor- $\alpha$  and interleukin-1 $\beta$  plasma levels. In contrast to our study, lipopolysaccharide was given intravenously with an early administration of sevoflurane after the injury. In the current study, we were able to show antiinflammatory effects of sevoflurane even when administered 2 h after a lipopolysaccharide stimulation, *i.e.*, with late initiation of postconditioning. This may be of clinical relevance for patients who have already experienced a trigger event that may result in ALI, or even ARDS in that sevoflurane may beneficially interfere with the further development of the lung injury.

In this study, we focused on the difference between the intravenous anesthetic propofol and the volatile anesthetic sevoflurane. However, it remains questionable whether the observed difference would also be found with other intravenous anesthetics. Interestingly, in cardiac ischemia-reperfusion injury, protection by volatile anesthetics, morphine, and propofol is relatively well investigated.<sup>47</sup> It is generally agreed that these agents reduce the myocardial damage caused by ischemia and reperfusion. Other anesthetics, which are often used in clinical practice, such as fentanyl, ketamine, barbiturates, and benzodiazepines, have been much less studied, and their potential as cardioprotectors is currently

unknown. Therefore, general conclusions should not be drawn.

Today, sedation of patients with ALI/ARDS in the ICU is commonly performed using propofol. In the last years, the antiinflammatory effects of this intravenous anesthetic have been extensively studied in several *in vivo* studies. It has been shown that propofol has antiinflammatory effects that attenuate cytokine response after endotoxin shock in rats.<sup>48,49</sup> Several studies suggest that pretreatment and posttreatment with propofol provides protective effects in endotoxin-induced ALI<sup>19,50</sup> and lipopolysaccharide-induced shock.<sup>51</sup> However, the antiinflammatory effects of propofol are thought to be at least in part due to containing EDTA, which is a component of the commercially used propofol formulation.<sup>52</sup> In our study, we used a propofol formulation in 14% Cremophor without EDTA as clinically used propofol would induce hypervolemia in rats because of the low concentration of propofol. This could explain why fewer antiinflammatory effects in the propofol groups were found. However, a recent clinical trial comparing the antiinflammatory property of sevoflurane and propofol in patients undergoing thoracic surgery with one-lung ventilation has also shown less inflammatory response in the sevoflurane group, even in the presence of EDTA.<sup>53</sup>

Since the AnaConDa was approved for the use in ICUs, it is now possible to take advantage of the properties of volatile anesthetics, such as fast induction, fast awakening, and easy titration, for sedation of postoperative and critically ill patients. Few studies have assessed the use of volatile anesthetics, especially sevoflurane, *via* AnaConDa in ICU patients so far.<sup>6,54</sup> Recently, a significantly shorter recovery time and a significantly shorter hospitalization time with sevoflurane sedation compared with propofol was demonstrated in patients after cardiothoracic surgery.<sup>54</sup> Up to now, there have been no clinical studies regarding the effects of sevoflurane sedation in patients with ALI or ARDS. The results of this *in vivo* study indicate that sevoflurane sedation of patients with ALI may be beneficial.

Our study has several limitations. First, as already discussed, we used a special formulation of propofol in 14% Cremophor without EDTA, which is not commonly used in the ICU. This could be a reason for the reduced immune response in the propofol group. In addition, findings of this study could be specific to this animal model. However, the lipopolysaccharide injection model has recently been evaluated to promise the most direct clinical relevance considering gram-negative sepsis in which ALI is most common.<sup>55,56</sup> Second, our observations are based on a model of a beginning ALI and therefore may not be applicable in already established ARDS. Moreover, we studied the effect of sevoflurane only during a very short period (6 h) compared with the clinical situation. In addition, we administered an  $\text{FiO}_2$  of 1.0 in our model, which is not commonly used in ICUs

except for severe cases of ARDS. To our knowledge, nothing is known about any interaction of hyperoxia and sevoflurane that may influence the antiinflammatory effects of sevoflurane. According to the literature, hyperoxia-induced toxic effects on cells appear only after exposure times of more than 12 h.<sup>57</sup> However, we cannot exclude that hyperoxia influences the antiinflammatory effects of sevoflurane in our model.

Despite these limitations, this study might be of clinical relevance. We could show that in developing ARDS, gas exchange deteriorates significantly less by just using sevoflurane as a sedative compared with propofol. This property of sevoflurane seems to be mediated by inhibition of lung inflammation as indicated by lower levels of cytokines and less recruitment of effector cells into the lung tissue. Sedating ICU patients with sevoflurane using the AnaConDa system might therefore be a promising new therapeutic approach for ALI and ARDS. Moreover, the application of sevoflurane can be easily combined with protective ventilation strategies, generating further interesting treatment options.

In conclusion, the current study indicates that anesthetic postconditioning with sevoflurane offers beneficial properties compared with propofol in a model of ALI *in vivo*.

## References

1. Rubenfeld GD, Caldwell E, Peabody E, Weaver J, Martin DP, Neff M, Stern EJ, Hudson LD: Incidence and outcomes of acute lung injury. *N Engl J Med* 2005; 353:1685-93
2. Ashbaugh DG, Bigelow DB, Petty TL, Levine BE: Acute respiratory distress in adults. *Lancet* 1967; 2:319-23
3. Phua J, Badia JR, Adhikari NK, Friedrich JO, Fowler RA, Singh JM, Scales DC, Stather DR, Li A, Jones A, Gattas DJ, Hallett D, Tomlinson G, Stewart TE, Ferguson ND: Has mortality from acute respiratory distress syndrome decreased over time? A systematic review. *Am J Respir Crit Care Med* 2009; 179:220-7
4. Girard TD, Bernard GR: Mechanical ventilation in ARDS: A state-of-the-art review. *Chest* 2007; 131:921-9
5. Pittet JF, Mackersie RC, Martin TR, Matthay MA: Biological markers of acute lung injury: Prognostic and pathogenetic significance. *Am J Respir Crit Care Med* 1997; 155:1187-205
6. Belda JF, Soro M, Badenes R, Meiser A, Garcia ML, Aguilar G, Marti FJ: The predictive performance of a pharmacokinetic model for manually adjusted infusion of liquid sevoflurane for use with the Anesthetic-Conserving Device (AnaConDa): A clinical study. *Anesth Analg* 2008; 106:1207-14
7. Suter D, Spahn DR, Blumenthal S, Reyes L, Booy C, Z'Graggen BR, Beck-Schimmer B: The immunomodulatory effect of sevoflurane in endotoxin-injured alveolar epithelial cells. *Anesth Analg* 2007; 104:638-45
8. Reutershan J, Chang D, Hayes JK, Ley K: Protective effects of isoflurane pretreatment in endotoxin-induced lung injury. *ANESTHESIOLOGY* 2006; 104:511-7
9. Beck-Schimmer B, Urech S, De Conno E, Wittlinger M, Puhon M, Jochum W, Spahn DR, Clavien PA: A randomized controlled trial on pharmacological preconditioning in liver surgery using a volatile anesthetic. *Ann Surg* 2008; 248:909-18
10. Yue T, Roth Z'Graggen B, Blumenthal S, Neff SB, Reyes L, Booy C, Steurer M, Spahn DR, Neff TA, Schmid ER, Beck-Schimmer B: Postconditioning with a volatile anaesthetic in alveolar epithelial cells *in vitro*. *Eur Respir J* 2008; 31:118-25
11. Riess ML, Stowe DF, Warltier DC: Cardiac pharmacological preconditioning with volatile anesthetics: From bench to bedside? *Am J Physiol Heart Circ Physiol* 2004; 286:H1603-7
12. Tanaka K, Ludwig LM, Kersten JR, Pagel PS, Warltier DC: Mechanisms of cardioprotection by volatile anesthetics. *ANESTHESIOLOGY* 2004; 100:707-21
13. Lee HT, Ota-Setlik A, Fu Y, Nasr SH, Emala CW: Differential protective effects of volatile anesthetics against renal ischemia-reperfusion injury *in vivo*. *ANESTHESIOLOGY* 2004; 101:1313-24

14. Liu R, Ishibe Y, Ueda M: Isoflurane-sevoflurane administration before ischemia attenuates ischemia-reperfusion-induced injury in isolated rat lungs. *ANESTHESIOLOGY* 2000; 92:833-40
15. Kalb R, Schober P, Schwarte LA, Weimann J, Loer SA: Preconditioning, but not postconditioning, with sevoflurane reduces pulmonary neutrophil accumulation after lower body ischaemia/reperfusion injury in rats. *Eur J Anaesthesiol* 2008; 25:454-9
16. Beck-Schimmer B, Madjdpour C, Kneller S, Ziegler U, Pasch T, Wuthrich RP, Ward PA, Schimmer RC: Role of alveolar epithelial ICAM-1 in lipopolysaccharide-induced lung inflammation. *Eur Respir J* 2002; 19:1142-50
17. Baker MT, Naguib M: Propofol: The challenges of formulation. *ANESTHESIOLOGY* 2005; 103:860-76
18. Livak KJ, Schmittgen TD: Analysis of relative gene expression data using real-time quantitative PCR and the 2(-Delta Delta C(T)) method. *Methods* 2001; 25:402-8
19. Chen HI, Hsieh NK, Kao SJ, Su CF: Protective effects of propofol on acute lung injury induced by oleic acid in conscious rats. *Crit Care Med* 2008; 36:1214-21
20. Chen HI, Yeh DY, Liou HL, Kao SJ: Insulin attenuates endotoxin-induced acute lung injury in conscious rats. *Crit Care Med* 2006; 34:758-64
21. Stewart JC: Colorimetric determination of phospholipids with ammonium ferrothiocyanate. *Anal Biochem* 1980; 104:10-4
22. Douglas WH, Kaighn ME: Clonal isolation of differentiated rat lung cells. *In Vitro* 1974; 10:230-7
23. Ishibe Y, Gui X, Uno H, Shiokawa Y, Umeda T, Suekane K: Effect of sevoflurane on hypoxic pulmonary vasoconstriction in the perfused rabbit lung. *ANESTHESIOLOGY* 1993; 79:1348-53
24. Domino KB, Borowec L, Alexander CM, Williams JJ, Chen L, Marshall C, Marshall BE: Influence of isoflurane on hypoxic pulmonary vasoconstriction in dogs. *ANESTHESIOLOGY* 1986; 64:423-9
25. Schwarzkopf K, Schreiber T, Preussler NP, Gaser E, Huter L, Bauer R, Schubert H, Karzai W: Lung perfusion, shunt fraction, and oxygenation during one-lung ventilation in pigs: The effects of desflurane, isoflurane, and propofol. *J Cardiothorac Vasc Anesth* 2003; 17:73-5
26. Beck DH, Doepfner UR, Sinemus C, Bloch A, Schenk MR, Kox WJ: Effects of sevoflurane and propofol on pulmonary shunt fraction during one-lung ventilation for thoracic surgery. *Br J Anaesth* 2001; 86:38-43
27. Pruszkowski O, Dalibon N, Moutafis M, Jugan E, Law-Koune JD, Laloe PA, Fischler M: Effects of propofol *versus* sevoflurane on arterial oxygenation during one-lung ventilation. *Br J Anaesth* 2007; 98:539-44
28. Johnston B, Burns AR, Suematsu M, Issekutz TB, Woodman RC, Kubes P: Chronic inflammation upregulates chemokine receptors and induces neutrophil migration to monocyte chemoattractant protein-1. *J Clin Invest* 1999; 103:1269-76
29. Vozzelli MA, Mason SN, Whorton MH, Auten RL Jr: Antimacrophage chemokine treatment prevents neutrophil and macrophage influx in hyperoxia-exposed newborn rat lung. *Am J Physiol Lung Cell Mol Physiol* 2004; 286:L488-93
30. Watanabe T, Higuchi K, Hamaguchi M, Shiba M, Tominaga K, Fujiwara Y, Matsumoto T, Arakawa T: Monocyte chemoattractant protein-1 regulates leukocyte recruitment during gastric ulcer recurrence induced by tumor necrosis factor-alpha. *Am J Physiol Gastrointest Liver Physiol* 2004; 287:G919-28
31. Yamasawa H, Ishii Y, Kitamura S: Cytokine-induced neutrophil chemoattractant in a rat model of lipopolysaccharide-induced acute lung injury. *Inflammation* 1999; 23:263-74
32. Bernard GR, Artigas A, Brigham KL, Carlet J, Falke K, Hudson L, Lamy M, Legall JR, Morris A, Spragg R: The American-European Consensus Conference on ARDS: Definitions, mechanisms, relevant outcomes, and clinical trial coordination. *Am J Respir Crit Care Med* 1994; 149:818-24
33. Peng X, Hassoun PM, Sammani S, McVerry BJ, Burne MJ, Rabb H, Pearce D, Tudor RM, Garcia JG: Protective effects of sphingosine 1-phosphate in murine endotoxin-induced inflammatory lung injury. *Am J Respir Crit Care Med* 2004; 169:1245-51
34. Ingenito EP, Mora R, Cullivan M, Marzan Y, Haley K, Mark L, Sonna LA: Decreased surfactant protein-B expression and surfactant dysfunction in a murine model of acute lung injury. *Am J Respir Cell Mol Biol* 2001; 25:35-44
35. Pryhuber GS, Bachurski C, Hirsch R, Bacon A, Whittsett JA: Tumor necrosis factor-alpha decreases surfactant protein B mRNA in murine lung. *Am J Physiol* 1996; 270:L714-21
36. Quintero OA, Korfhagen TR, Wright JR: Surfactant protein A regulates surfactant phospholipid clearance after LPS-induced injury *in vivo*. *Am J Physiol Lung Cell Mol Physiol* 2002; 283:L76-85
37. Takala RS, Soukka HR, Kirvela OA, Kujari HP, Pelliniemi IJ, Kaapa PO, Aantaa RE: Alveolar integrity and ultrastructure in pigs remain undamaged after exposure to sevoflurane. *Acta Anaesthesiol Scand* 2002; 46:1137-43
38. Takala RS, Soukka H, Salo MS, Kirvela O, Kaapa P, Aantaa R: Gene expression of pulmonary cytokines after sevoflurane or thiopentone anaesthesia in pigs. *Acta Anaesthesiol Scand* 2006; 50:163-7
39. Takala RS, Soukka HR, Salo MS, Kirvela OA, Kaapa PO, Rajamaki AA, Riutta A, Aantaa RE: Pulmonary inflammatory mediators after sevoflurane and thiopentone anaesthesia in pigs. *Acta Anaesthesiol Scand* 2004; 48:40-5
40. Sung EG, Jee D, Song IH, Kim HS, Bae JH, Park SH: Propofol attenuates Kupffer cell activation during hypoxia-reoxygenation. *Can J Anaesth* 2005; 52:921-6
41. Fourcade O, Simon MF, Litt L, Samii K, Chap H: Propofol inhibits human platelet aggregation induced by proinflammatory lipid mediators. *Anesth Analg* 2004; 99:393-8
42. Chikutei K, Oyama TM, Ishida S, Okano Y, Kobayashi M, Matsui H, Horimoto K, Nishimura Y, Ueno SY, Oyama Y: Propofol, an anesthetic possessing neuroprotective action against oxidative stress, promotes the process of cell death induced by H2O2 in rat thymocytes. *Eur J Pharmacol* 2006; 540:18-23
43. Shao H, Li J, Zhou Y, Ge Z, Fan J, Shao Z, Zeng Y: Dose-dependent protective effect of propofol against mitochondrial dysfunction in ischaemic/reperfused rat heart: Role of cardiolipin. *Br J Pharmacol* 2008; 153:1641-9
44. Wang B, Luo T, Chen D, Ansley DM: Propofol reduces apoptosis and up-regulates endothelial nitric oxide synthase protein expression in hydrogen peroxide-stimulated human umbilical vein endothelial cells. *Anesth Analg* 2007; 105:1027-33
45. Lang JD Jr, Chumley P, Eiserich JP, Estevez A, Bamberg T, Adhami A, Crow J, Freeman BA: Hypercapnia induces injury to alveolar epithelial cells *via* a nitric oxide-dependent pathway. *Am J Physiol Lung Cell Mol Physiol* 2000; 279:L994-1002
46. Hofstetter C, Boost KA, Flondor M, Basagan-Mogol E, Betz C, Homann M, Muhl H, Pfeilschifter J, Zwissler B: Anti-inflammatory effects of sevoflurane and mild hypothermia in endotoxemic rats. *Acta Anaesthesiol Scand* 2007; 51:893-9
47. Kato R, Foex P: Myocardial protection by anesthetic agents against ischemia-reperfusion injury: An update for anesthesiologists. *Can J Anaesth* 2002; 49:777-91
48. Taniguchi T, Kanakura H, Yamamoto K: Effects of posttreatment with propofol on mortality and cytokine responses to endotoxin-induced shock in rats. *Crit Care Med* 2002; 30:904-7
49. Taniguchi T, Yamamoto K, Ohmoto N, Ohta K, Kobayashi T: Effects of propofol on hemodynamic and inflammatory responses to endotoxemia in rats. *Crit Care Med* 2000; 28:1101-6
50. Gao J, Zeng BX, Zhou LJ, Yuan SY: Protective effects of early treatment with propofol on endotoxin-induced acute lung injury in rats. *Br J Anaesth* 2004; 92:277-9
51. Hsu BG, Yang FL, Lee RP, Peng TC, Chen HI: Effects of post-treatment with low-dose propofol on inflammatory responses to lipopolysaccharide-induced shock in conscious rats. *Clin Exp Pharmacol Physiol* 2005; 32:24-9
52. Herr DL, Kelly K, Hall JB, Ulatowski J, Fulda GJ, Cason B, Hickey R, Neiman AM, Zaloga GP, Teres D: Safety and efficacy of propofol with EDTA when used for sedation of surgical intensive care unit patients. *Intensive Care Med* 2000; 26 (Suppl 4):S452-62
53. De Conno E, Steurer MP, Wittlinger M, Zalunardo MP, Weder W, Schneider D, Schimmer RC, Klaghofer R, Neff TA, Schmid ER, Spahn DR, Z'Graggen BR, Urner M, Beck-Schimmer B: Anesthetic-induced improvement of the inflammatory response to one-lung ventilation. *ANESTHESIOLOGY* 2009; 110:1316-26
54. Rohm KD, Wolf MW, Schollhorn T, Schellhaass A, Boldt J, Piper SN: Short-term sevoflurane sedation using the Anaesthetic Conserving Device after cardiothoracic surgery. *Intensive Care Med* 2008; 34:1683-9
55. Brigham KL, Meyrick B: Endotoxin and lung injury. *Am Rev Respir Dis* 1986; 133:913-27
56. Wang HM, Bodenstein M, Markstaller K: Overview of the pathology of three widely used animal models of acute lung injury. *Eur Surg Res* 2008; 40:305-16
57. Tateda K, Deng JC, Moore TA, Newstead MW, Paine R III, Kobayashi N, Yamaguchi K, Standiford TJ: Hyperoxia mediates acute lung injury and increased lethality in murine Legionella pneumonia: The role of apoptosis. *J Immunol* 2003; 170:4209-16
